# Supplementary material for: Interface modification of an electron transport layer using europium acetate for enhancing the performance of P3HT-based inorganic perovskite solar cells
Source: Royal Society of Chemistry journal article supplement (doi:10.1039/d1cp03645a), 2021-01-01
Supplement: d1cp03645a1.pdf [file d1cp03645a1.pdf]

## Supporting Information

# Interface modification of Electron Transport Layer using Europium Acetate for Enhancing the Performance of P3HT- Based Inorganic perovskite Solar Cells

Weihua Ren<sup>a</sup>, Yifan Liu<sup>a</sup>, Yukun Wu<sup>a</sup>, Qinjun Sun<sup>a</sup>, Yanxia Cui<sup>a</sup>, Yuying Hao<sup>a\*</sup>

<sup>a</sup> College of Physics and Optoelectronics, Key Lab of Advanced Transducers and Intelligent Control System, Taiyuan University of Technology, Taiyuan 030024, China

\*Corresponding author: [haoyuying@tyut.edu.cn](mailto:haoyuying@tyut.edu.cn)

---

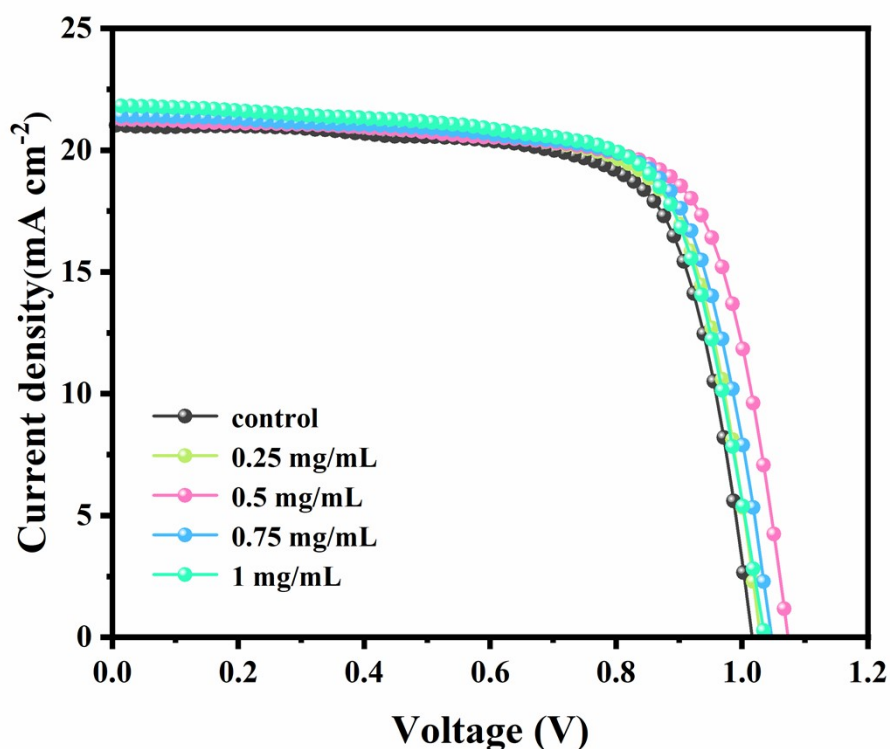

Figure S1. *J-V* curves of CsPbI<sub>3</sub> PSCs made with various concentration EuAc<sub>3</sub>



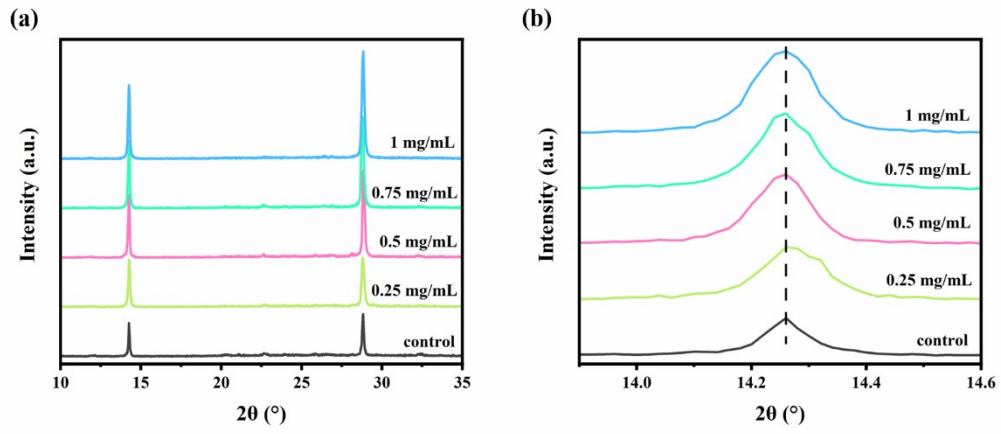

**Figure S2. (a)** XRD patterns and **(b)** (110) diffraction peaks of CsPbI<sub>3</sub> perovskite films made with EuAc<sub>3</sub> of different concentration

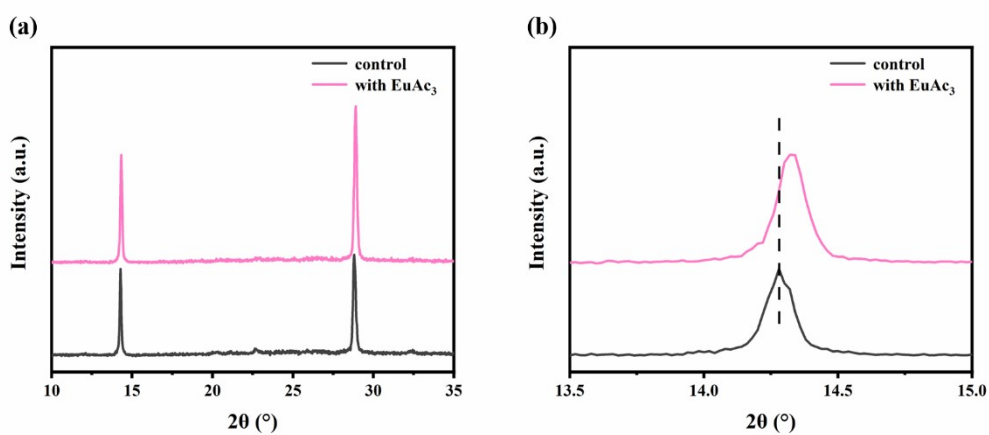

**Figure S3.** (a) XRD patterns of CsPbI<sub>3</sub> perovskite films on different TiO<sub>2</sub> substrate without and with EuAc<sub>3</sub> treatment, (b) (110) diffraction peaks of CsPbI<sub>3</sub> perovskite films without and with EuAc<sub>3</sub>

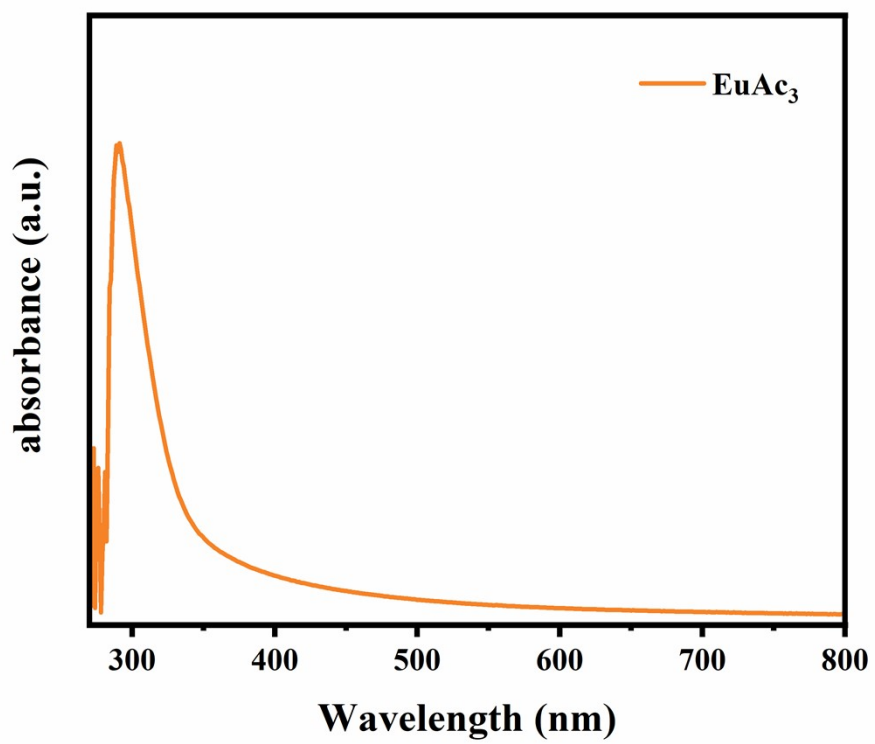

**Figure S4.** UV-vis absorption spectra of the EuAc<sub>3</sub> films

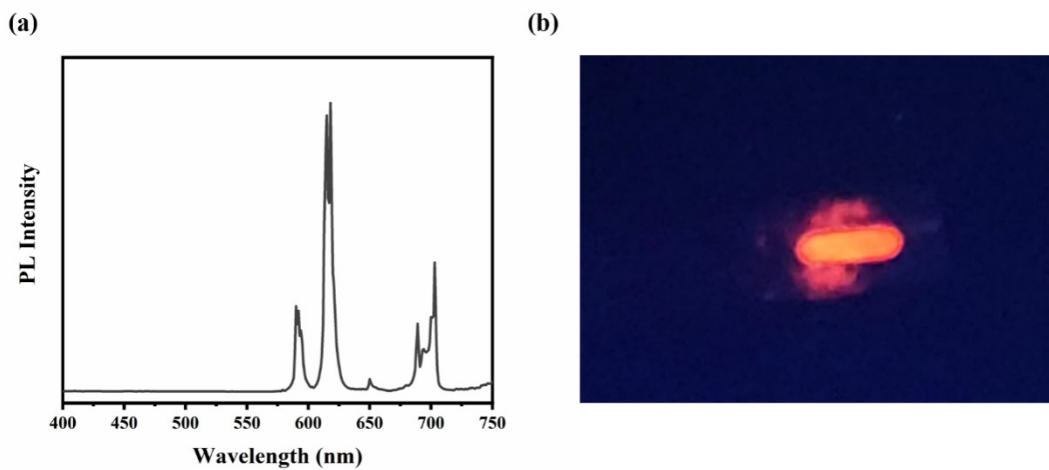

**Figure S5** (a) PL spectra of  $\text{EuAc}_3$  film, (b) Photoluminescence picture of  $\text{EuAc}_3$  powder under UV light at 365nm

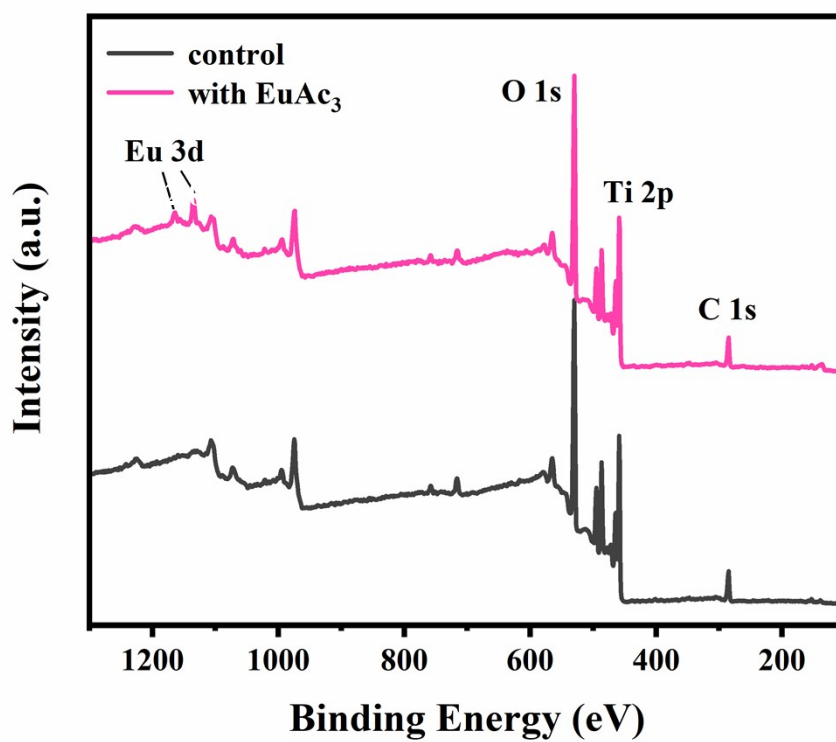

**Figure S6.** XPS whole spectra of  $\text{TiO}_2$  and  $\text{TiO}_2\text{-EuAc}_3$  films.

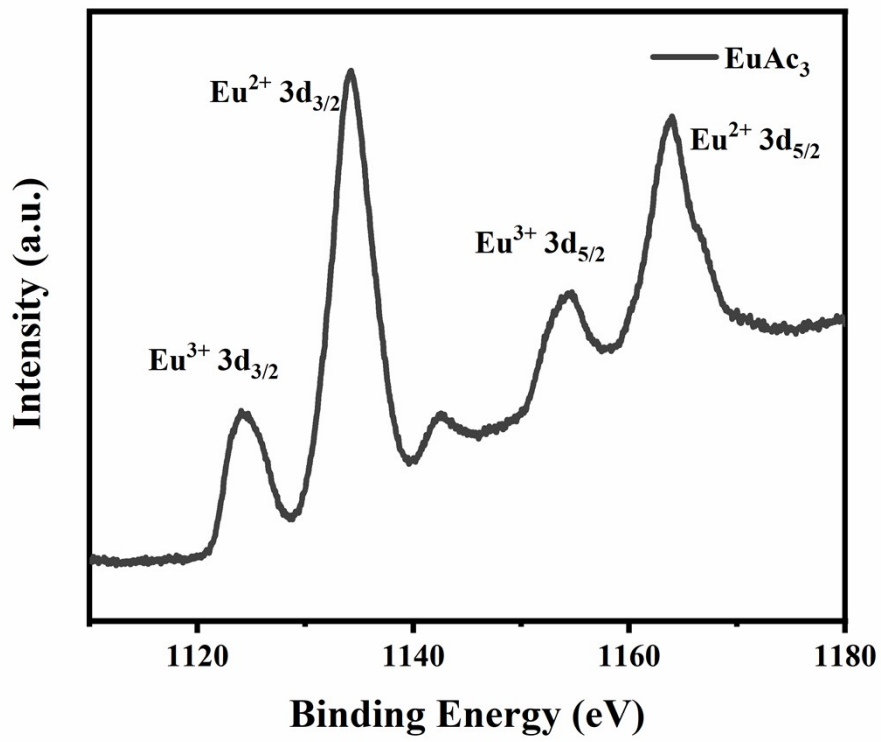

Figure S7. XPS spectra of EuAc<sub>3</sub> powder

**(a)**

| Ref | Name       | Peak BE | Height CPS | Height Ratio | Area CPS.eV | Area Ratio |
|-----|------------|---------|------------|--------------|-------------|------------|
| C   | O1s        | 529.86  | 167393.72  | 1.00         | 211971.84   | 1.00       |
| D   | O1s Scan A | 531.10  | 34289.03   | 0.20         | 89321.73    | 0.42       |

**(b)**

| Ref | Name       | Peak BE | Height CPS | Height Ratio | Area CPS.eV | Area Ratio |
|-----|------------|---------|------------|--------------|-------------|------------|
| C   | O1s        | 529.46  | 167977.85  | 1.00         | 224496.01   | 1.00       |
| D   | O1s Scan A | 531.08  | 30424.45   | 0.18         | 63403.76    | 0.28       |

**Figure S8.** XPS data of different TiO<sub>2</sub> (a) without EuAc<sub>3</sub>; (b) with EuAc<sub>3</sub>



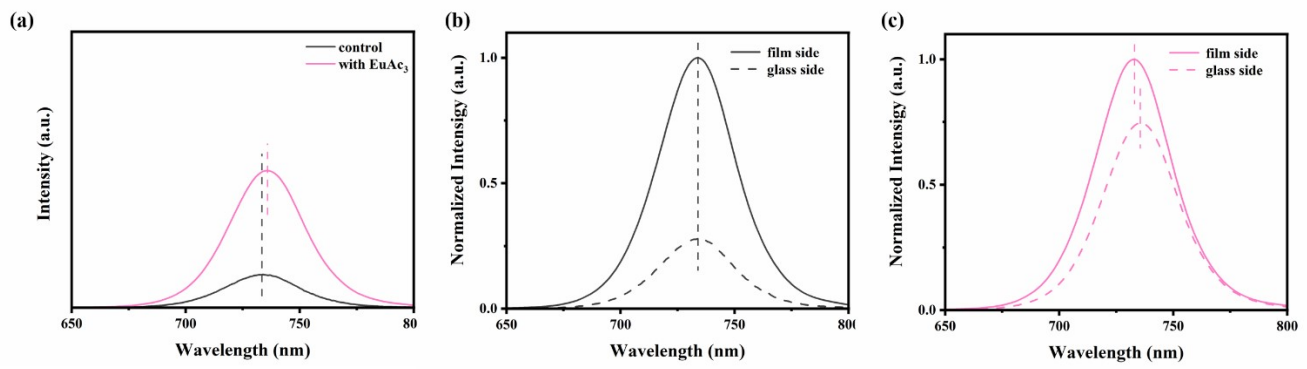

**Figure S9.** (a) PL spectra of the CsPbI<sub>3</sub> perovskite without and with EuAc<sub>3</sub>, in which the CsPbI<sub>3</sub> film was excited from glass side. Normalized PL spectra of (b) control and (c) EuAc<sub>3</sub> modified CsPbI<sub>3</sub> film with different excited direction.

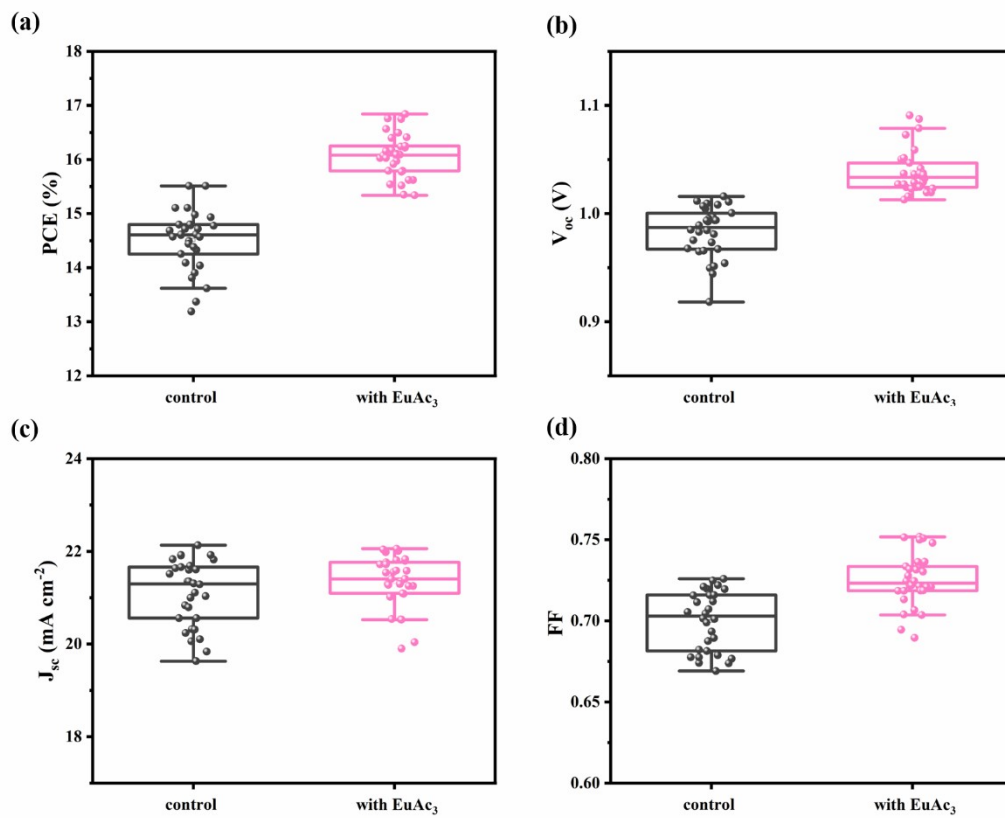

**Figure S10.** Box charts of (a)  $PCE$ , (b)  $V_{oc}$ , (c)  $FF$  and (d)  $J_{sc}$  of control and EuAc<sub>3</sub> modified PSCs

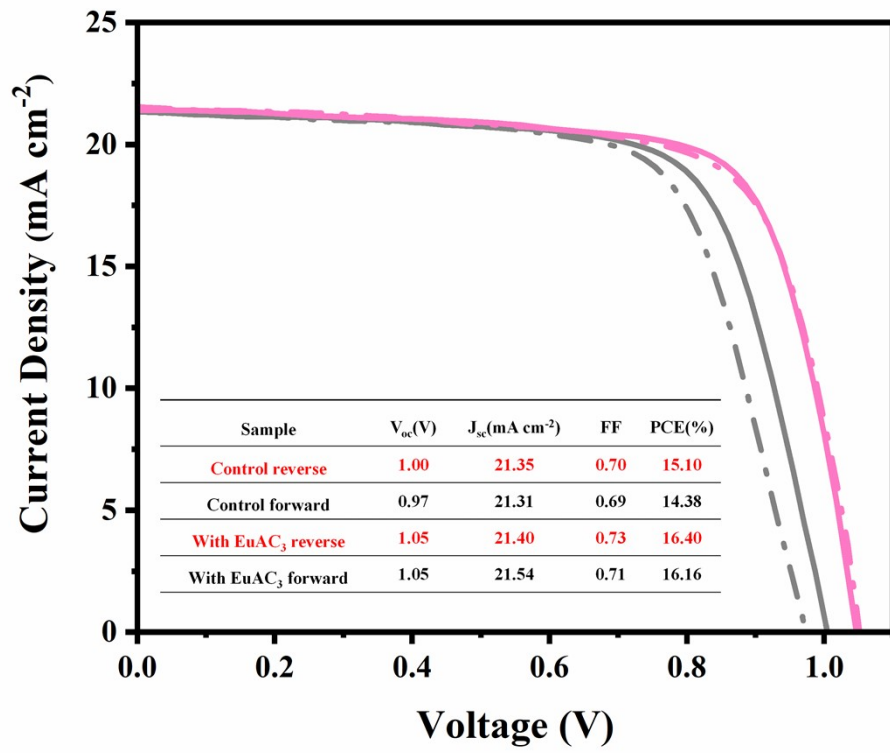

Figure S11.  $J$ - $V$  curves of control and  $\text{EuAc}_3$  modified  $\text{CsPbI}_3$  PSCs under reverse and forward scan.

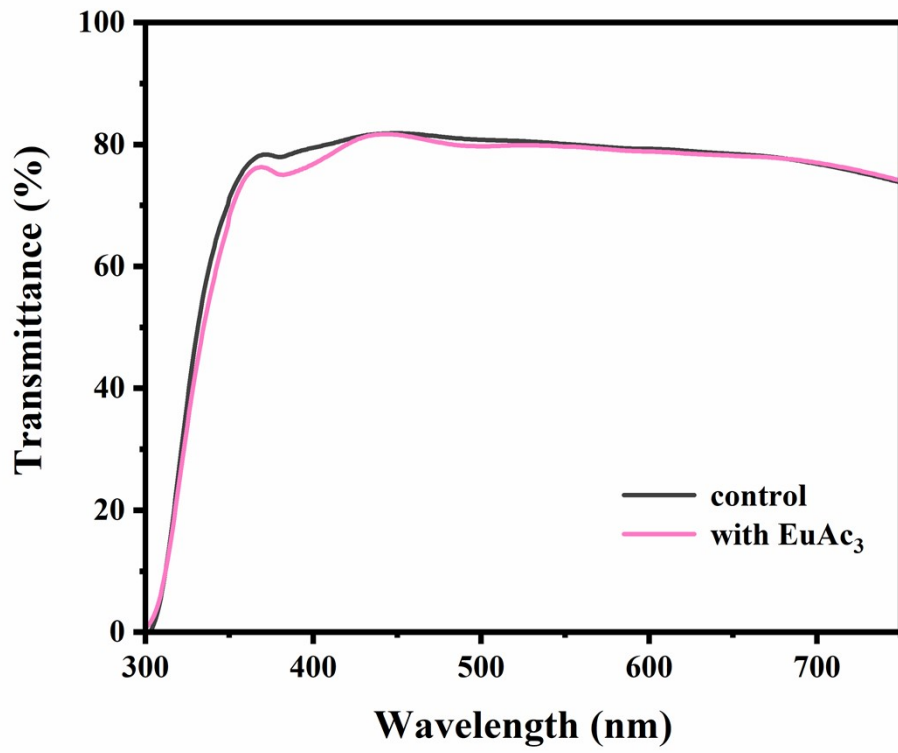

**Figure S12.** Transmission spectra of different TiO<sub>2</sub> films with and without EuAc<sub>3</sub> treatment on FTO substrate.

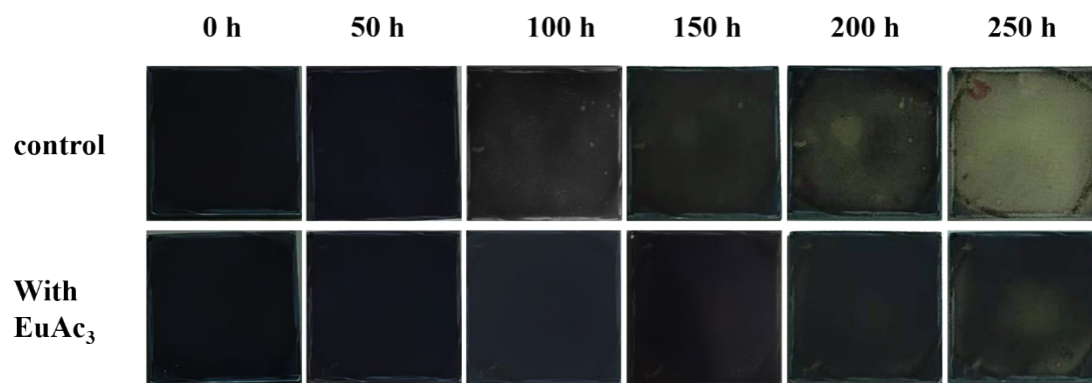

**Figure S13.** Pictures of UV stability measurement of control and EuAc<sub>3</sub> treated CsPbI<sub>3</sub> film.

**Table S1** parameters of the TRPL spectra of control and EuAc<sub>3</sub> passivated perovskite film with different concentration (extracted from Figure 3b)

|                              | <b>A1 (%)</b> | <b><math>\tau_1</math> (ns)</b> | <b>A2 (%)</b> | <b><math>\tau_1</math> (ns)</b> | <b><math>\tau_{avg}</math> (ns)</b> |
|------------------------------|---------------|---------------------------------|---------------|---------------------------------|-------------------------------------|
| <b>Control</b>               | 89.54         | 2.02                            | 10.46         | 9.45                            | 4.62                                |
| <b>With EuAc<sub>3</sub></b> | 85.43         | 4.22                            | 14.57         | 17.13                           | 9.50                                |

**Table S2** parameters of the EIS spectra of control and 0.5 mg/ml EuAc<sub>3</sub> passivated PSCs

|                              | <b>Rs (<math>\Omega</math>)</b> | <b>Rct (M<math>\Omega</math>)</b> | <b>Rrec (M<math>\Omega</math>)</b> |
|------------------------------|---------------------------------|-----------------------------------|------------------------------------|
| <b>Control</b>               | 57.71                           | 0.20                              | 4.44                               |
| <b>With EuAc<sub>3</sub></b> | 59.87                           | 0.18                              | 10.94                              |

**Table S3** summary of high performance of the CsPbI<sub>3</sub> PSCs based on P3HT HTL

| <b>Device structure</b>                                                    | <b>Voc (V)</b> | <b>Jsc (mA cm<sup>-2</sup>)</b> | <b>FF</b> | <b>PCE (%)</b> | <b>Ref</b> |
|----------------------------------------------------------------------------|----------------|---------------------------------|-----------|----------------|------------|
| <b>FTO/c-TiO<sub>2</sub>/m-TiO<sub>2</sub>/PVK/P3HT/MoO<sub>3</sub>/Au</b> | 0.67           | 11.3                            | 0.67      | 4.6            | 1          |
| <b>FTO/c-TiO<sub>2</sub>/PVK/P3HT/Au</b>                                   | 1.06           | 13.8                            | 0.72      | 10.5           | 2          |
| <b>FTO/c-TiO<sub>2</sub>/PVK/P3HT/Au</b>                                   | 0.71           | 12.1                            | 0.67      | 5.7            | 3          |
| <b>FTO/c-TiO<sub>2</sub>/PVK/P3HT/Ag</b>                                   | 0.81           | 12.1                            | 0.72      | 6.8            | 4          |
| <b>MgF<sub>2</sub>/FTO/c-TiO<sub>2</sub>/m-TiO<sub>2</sub>/PVK/P3HT/Au</b> | 0.95           | 17.9                            | 0.80      | 13.5           | 5          |
| <b>FTO/c-TiO<sub>2</sub>/PVK/P3HT/Au</b>                                   | 1.02           | 17.4                            | 0.80      | 14.1           | 6          |
| <b>FTO/c-TiO<sub>2</sub>/PVK/P3HT/Au</b>                                   | 1.06           | 12.21                           | 0.61      | 7.90           | 7          |
| <b>FTO/c-TiO<sub>2</sub>/EuAc<sub>3</sub>/PVK/P3HT/Au</b>                  | 1.10           | 21.20                           | 0.77      | 17.92          | This work  |

# References

- (1) Ripolles, T. S.; Nishinaka, K.; Ogomi, Y.; Miyata, Y.; Hayase, S. Efficiency enhancement by changing perovskite crystal phase and adding a charge extraction interlayer in organic amine free-perovskite solar cells based on cesium. *Solar Energy Materials and Solar Cells* **2016**, *144*, 532-536, DOI: 10.1016/j.solmat.2015.09.041.
- (2) Frolova, L. A.; Anokhin, D. V.; Piryazev, A. A.; Luchkin, S. Y.; Dremova, N. N.; Stevenson, K. J.; Troshin, P. A. Highly Efficient All-Inorganic Planar Heterojunction Perovskite Solar Cells Produced by Thermal Coevaporation of CsI and PbI<sub>2</sub>. *J. Phys. Chem. Lett.* **2017**, *8* (1), 67-72, DOI: 10.1021/acs.jpcclett.6b02594.
- (3) Yonezawa, K.; Yamamoto, K.; Shahiduzzaman, M.; Furumoto, Y.; Hamada, K.; Ripolles, T. S.; Karakawa, M.; Kuwabara, T.; Takahashi, K.; Hayase, S.; Taima, T. Annealing effects on CsPbI<sub>3</sub>-based planar heterojunction perovskite solar cells formed by vacuum deposition method. *Japanese Journal of Applied Physics* **2017**, *56* (4), DOI: 10.7567/jjap.56.04cs11.
- (4) Shahiduzzaman, M.; Yonezawa, K.; Yamamoto, K.; Ripolles, T. S.; Karakawa, M.; Kuwabara, T.; Takahashi, K.; Hayase, S.; Taima, T. Improved Reproducibility and Intercalation Control of Efficient Planar Inorganic Perovskite Solar Cells by Simple Alternate Vacuum Deposition of PbI<sub>2</sub> and CsI. *ACS Omega* **2017**, *2* (8), 4464-4469, DOI: 10.1021/acsomega.7b00814.
- (5) Lau, C. F. J.; Deng, X. F.; Zheng, J. H.; Kim, J.; Zhang, Z. L.; Zhang, M.; Bing, J. M.; Wilkinson, B.; Hu, L.; Patterson, R.; Huang, S. J.; Ho-Baillie, A. Enhanced performance via partial lead replacement with calcium for a CsPbI<sub>3</sub> perovskite solar cell exceeding 13% power conversion efficiency. *J. Mater. Chem. A* **2018**, *6* (14), 5580-5586, DOI: 10.1039/c7ta11154a.
- (6) Lau, C. F. J.; Wang, Z. P.; Sakai, N.; Zheng, J. H.; Liao, C. H.; Green, M.; Huang, S. J.; Snaith, H. J.; Ho-Baillie, A. Fabrication of Efficient and Stable CsPbI<sub>3</sub> Perovskite Solar Cells through Cation Exchange Process. *Adv. Energy Mater.* **2019**, *9* (36), DOI: 10.1002/aenm.201901685.
- (7) Ding, X. H.; Chen, H. B.; Wu, Y. H.; Ma, S.; Dai, S. Y.; Yang, S. F.; Zhu, J. Triple cation additive NH<sub>3</sub>+C<sub>2</sub>H<sub>4</sub>NH<sub>2</sub>+C<sub>2</sub>H<sub>4</sub>NH<sub>3</sub><sup>+</sup>-induced phase-stable inorganic alpha-CsPbI<sub>3</sub> perovskite films for use in solar cells (vol 6, pg 18258, 2018). *J. Mater. Chem. A* **2020**, *8* (24), 12177-12178, DOI: 10.1039/d0ta90124e.
